# Supplementary material for: A neural network potential for the IRMOF series and its application for thermal and mechanical behaviors
Source: Royal Society of Chemistry journal article supplement (doi:10.1039/d1cp05973d), 2022-01-01
Supplement: d1cp05973d1.pdf [file d1cp05973d1.pdf]

# A Neural Network Potential for IRMOF Series and Application on Thermal and Mechanical Behaviors

*Omer Tayfuroglu\**, *Abdulkadir Kocak*, *Yunus Zorlu*

Department of Chemistry, Gebze Technical University, 41400 Gebze, Kocaeli, Turkey

---

\* Corresponding Author

E-mail: [otayfuroglu@gtu.edu.tr](mailto:otayfuroglu@gtu.edu.tr) Phone: +902626053083

## Figures

**Figure S1.** FigureS1: IRMOF-n (n=1,4,6,7,10) fragments. F1-F5 are generated from IRMOF-1.

F6, F7, F8, F9 are from IRMOF-4, 6,7 and 10, respectively.....

**Figure S2.** Uncertainty between NNP1 and NNP2 energies according to number of data. ....

**Figure S3.** Training and validation loss curves.....

**Figure S4.** Histograms of energy errors show normal distribution a-training b-tests.....

**Figure S5.** DFT vs NNP energies of 9 fragments for a-training b-test.....

**Figure S6.** Histograms of force errors show normal distribution a-training b-tests .....

**Figure S7.** DFT vs NNP forces of 9 fragments for a-training b-test .....

**Figure S8.** IRMOF-1 truncated structure for phenylene ring torsion by scan of dihedral angle, ( $\Phi_{1234}$ ) from 0 to 180° and aromatic C-H distance of ( $r_{45}$ ) from 1.02Å to 1.16Å .....

**Figure S9.** IRMOF-1 and IRMOF-7 vibrations zoomed in different regions.....

**Figure S10.**  $\ln(\langle V \rangle)$  vs. T (in Kelvin) plots for thermal expansion coefficients .....

**Figure S11.** ASA and POAV change of a) IRMOF-1 and b) IRMOF-7 upon stress applied along [001] direction .....

## Tables

**Table S1.** Thermal expansion coefficient calculations based on quadratic and linear equations.

ST shows PTE to NTE switching temperature .....

**Table S2** Equilibrium lattice parameters produced by NNP at different temperatures. ....

**Table S3** Thermal pressure coefficients calculated from MD simulations using NNP .....

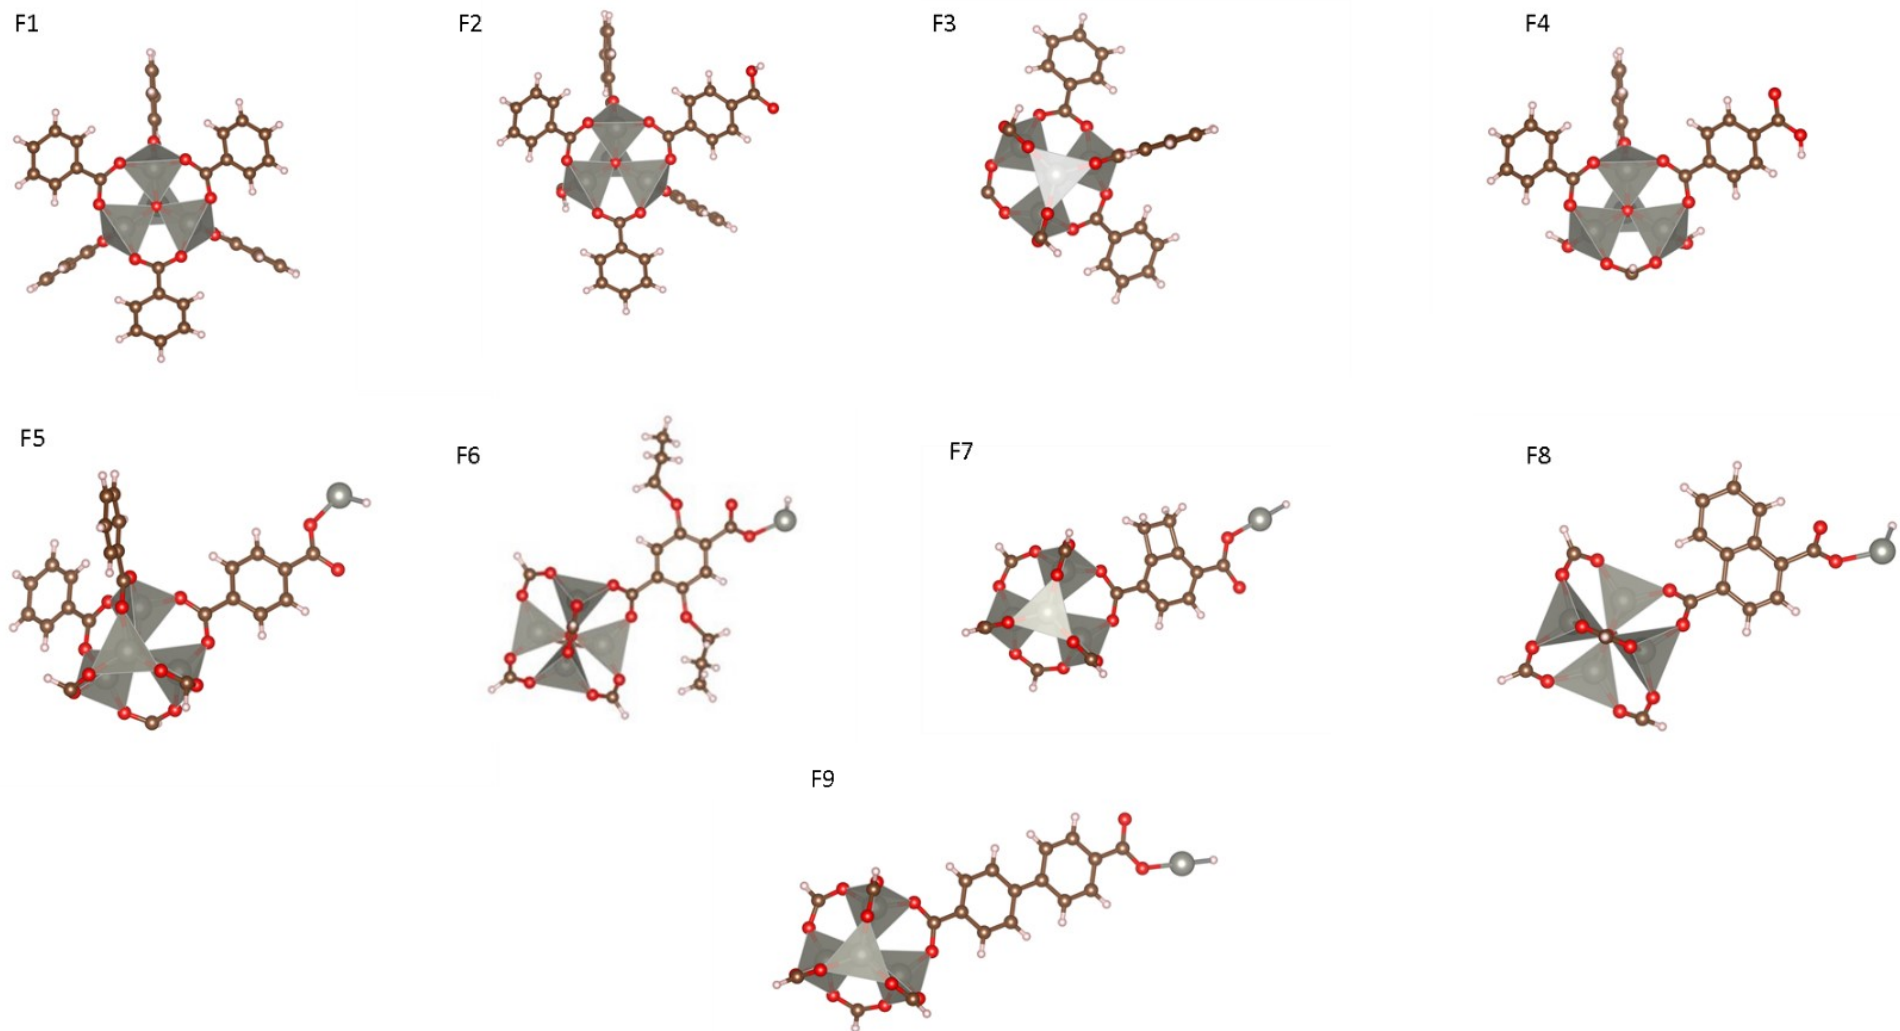

**Figure S1.** FigureS1: IRMOF-n ( $n=1,4,6,7,10$ ) fragments. F1-F5 are generated from IRMOF-1. F6, F7, F8, F9 are from IRMOF-4, 6,7 and 10, respectively.

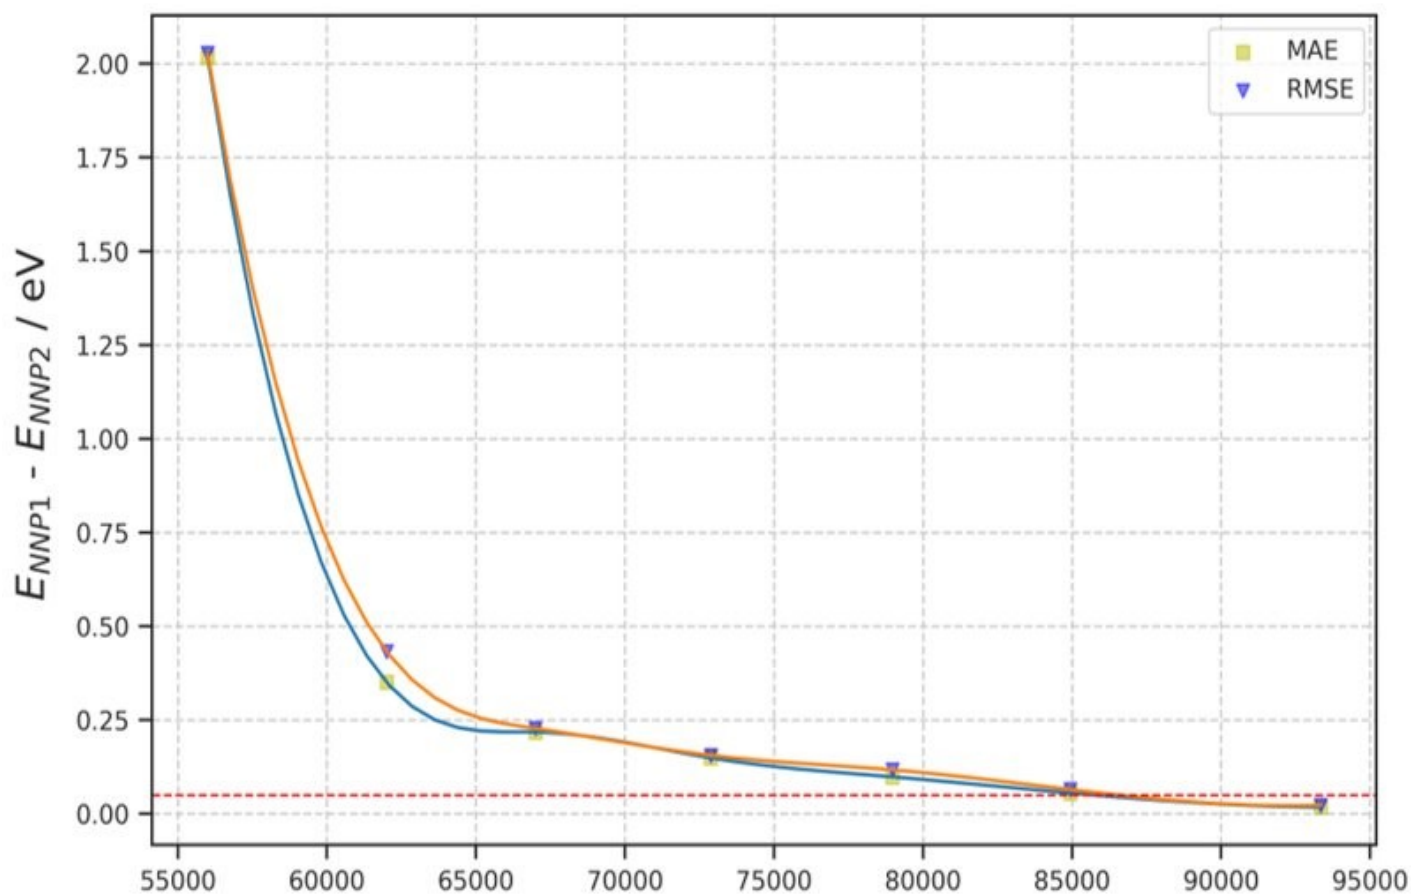

**Figure S2.** Uncertainty between NNP1 and NNP2 energies according to number of data.

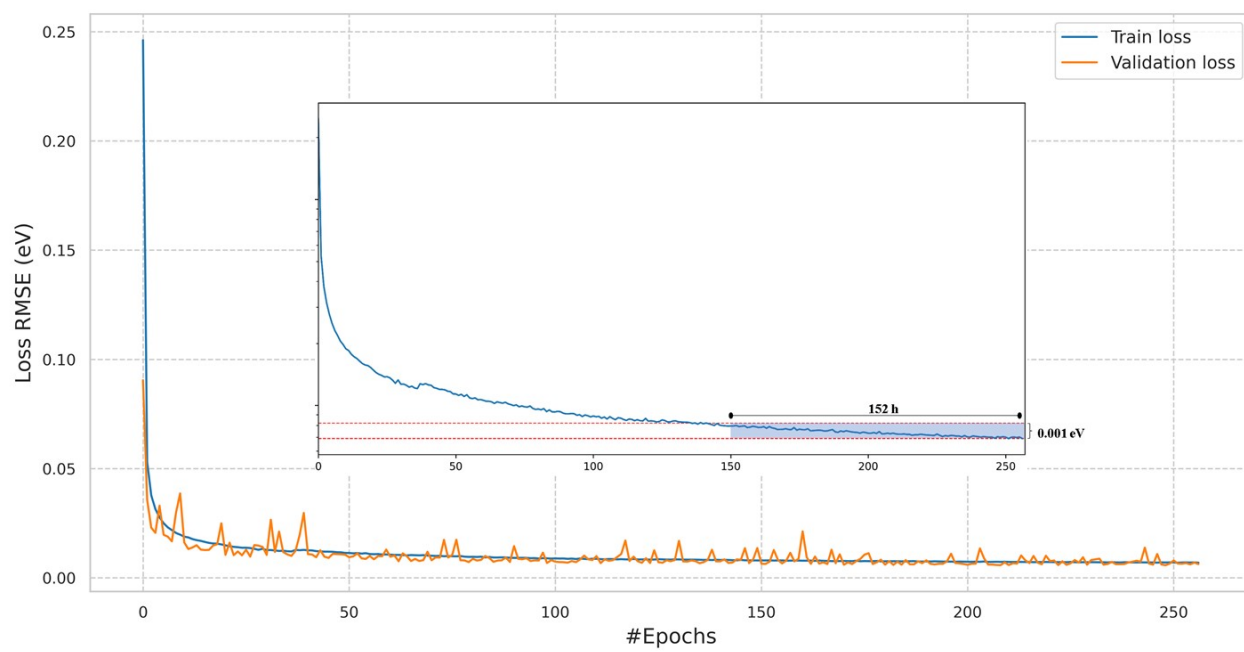

**Figure S3.** Training and validation loss curves. The inset is the logarithmic scale showing early stopping at 150 epoch.

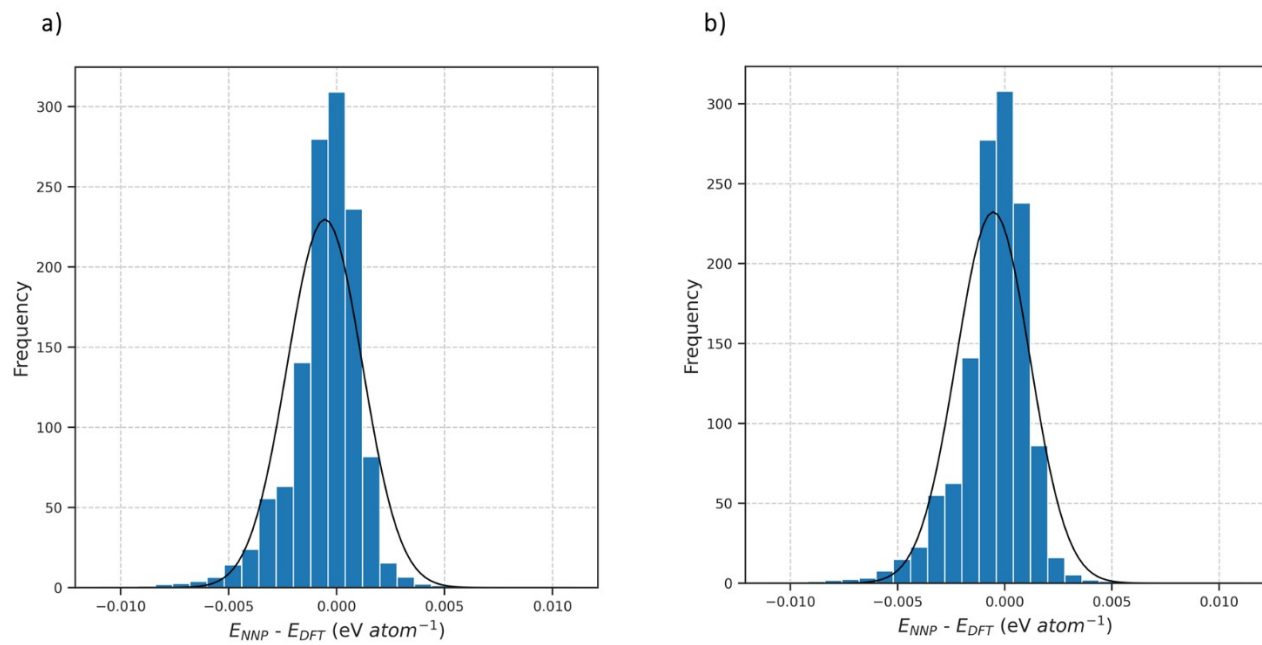

**Figure S4.** Histograms of energy errors show normal distribution a-training b-tests

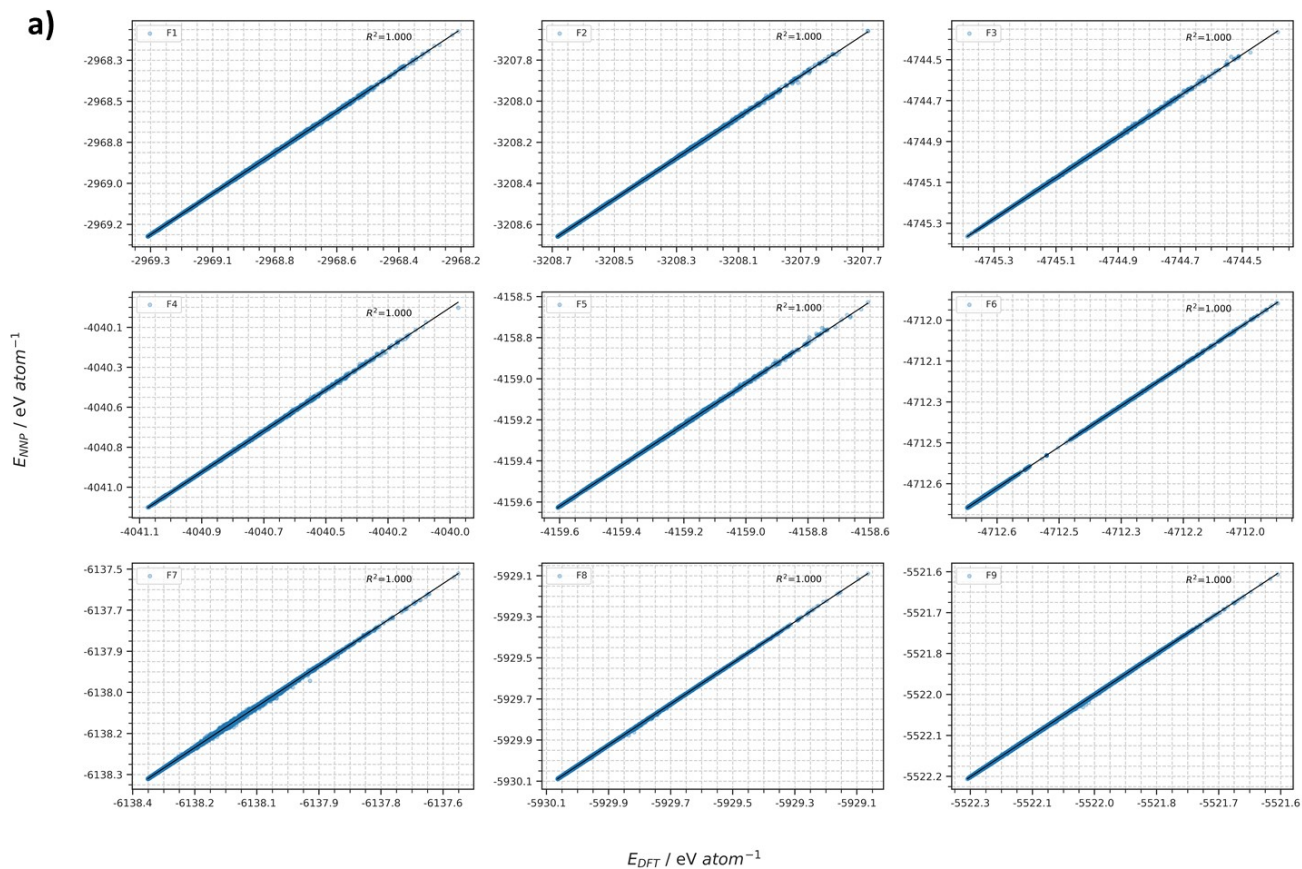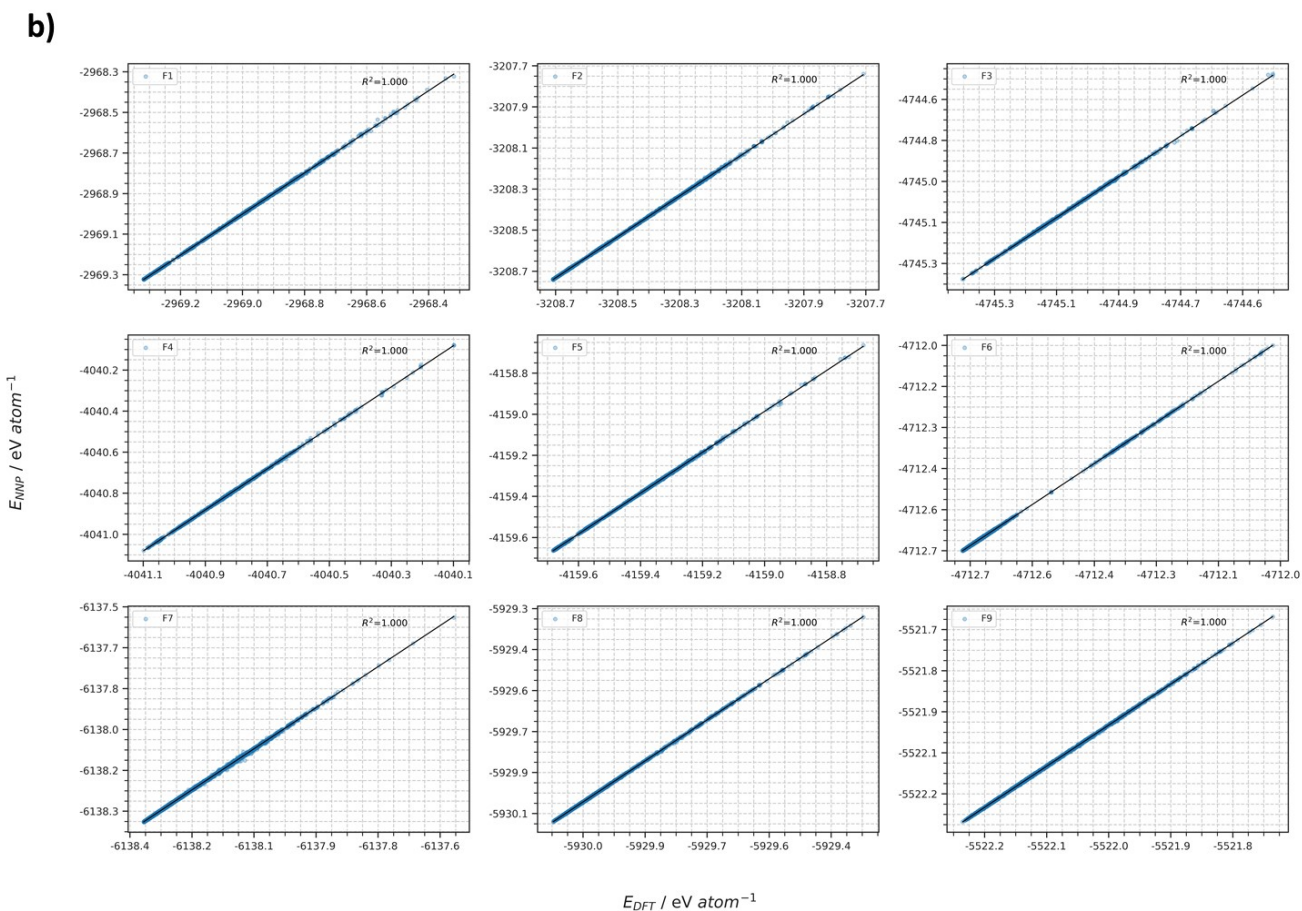

Figure S5. DFT vs NNP energies of 9 fragments for a-training b-test



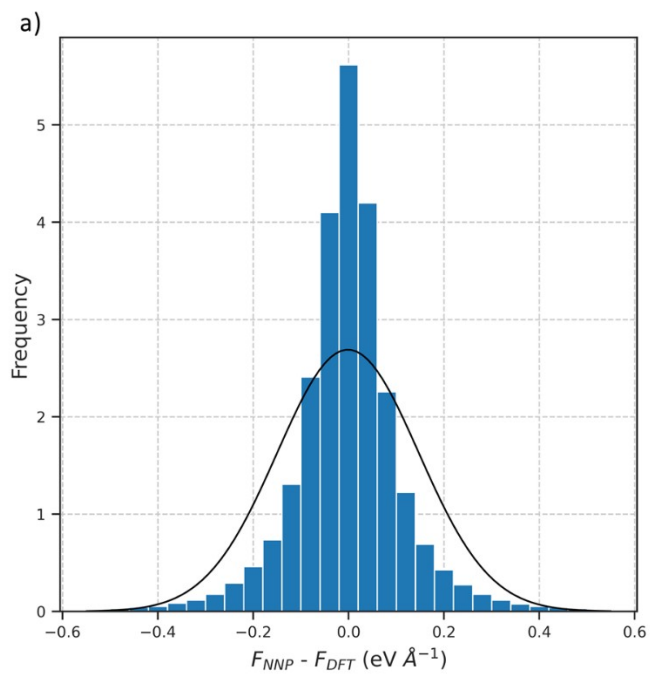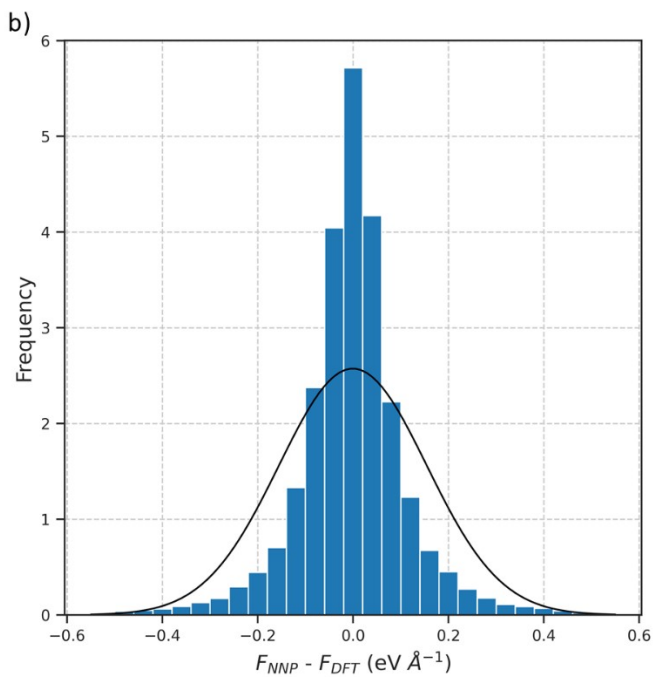

**Figure S6.** Histograms of force errors show normal distribution a-training b-tests

**a)**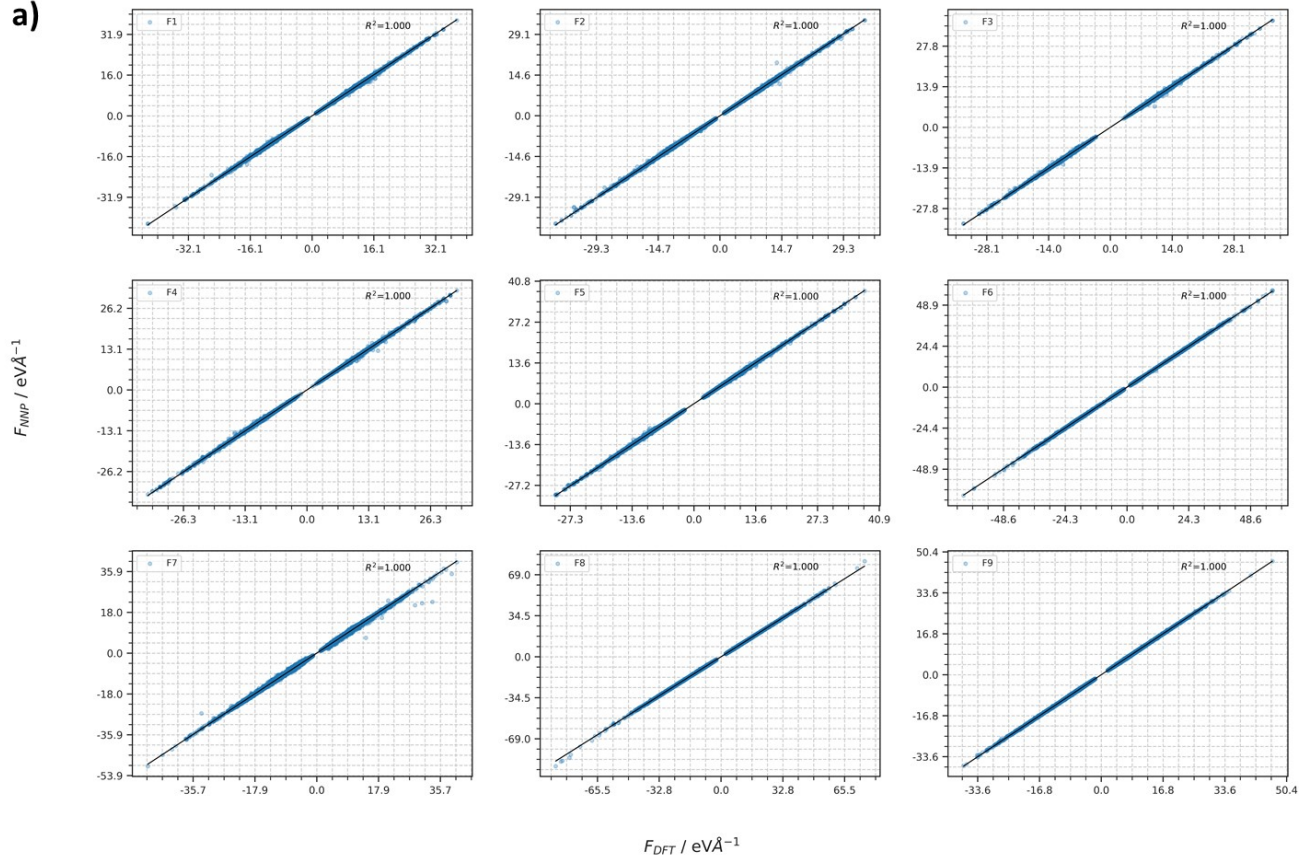**b)**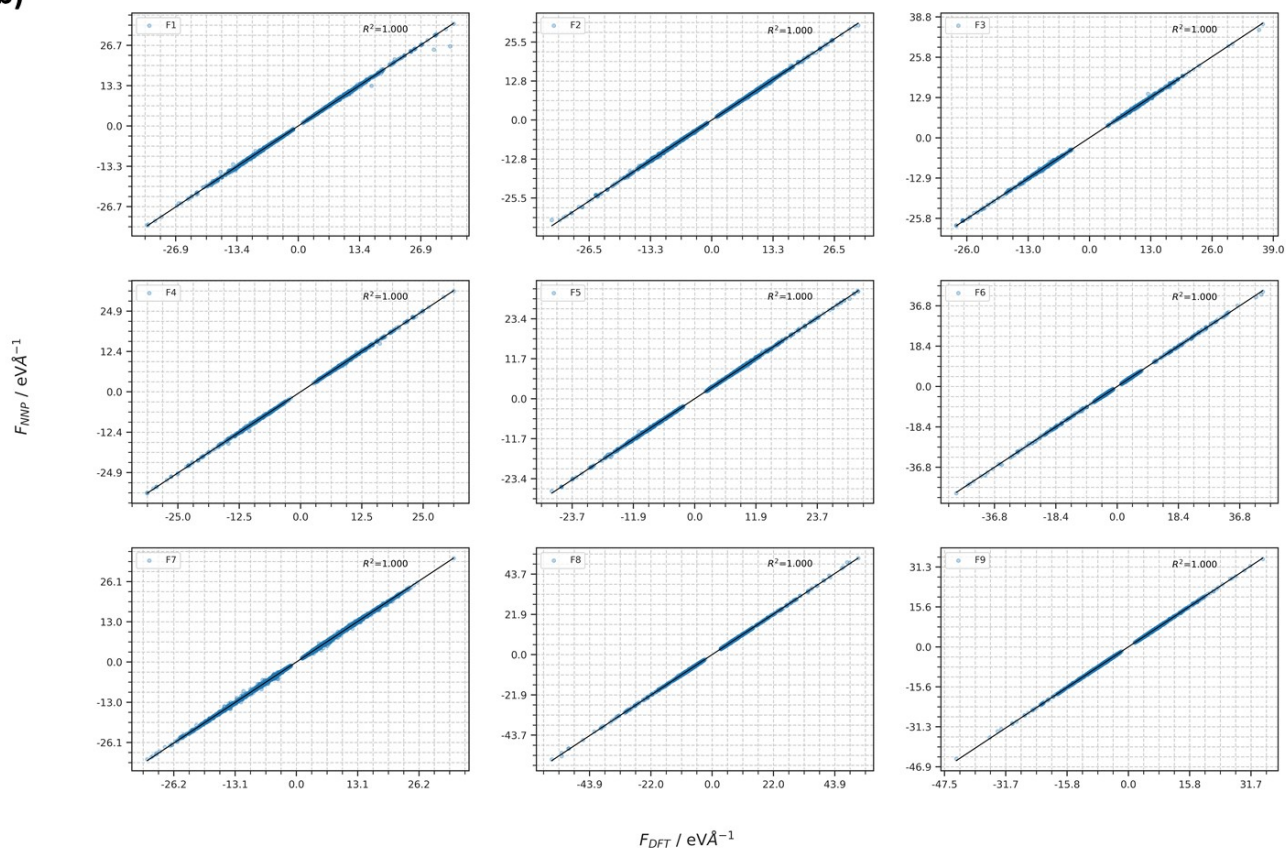**Figure S7.** DFT vs NNP forces of 9 fragments for a-training b-test



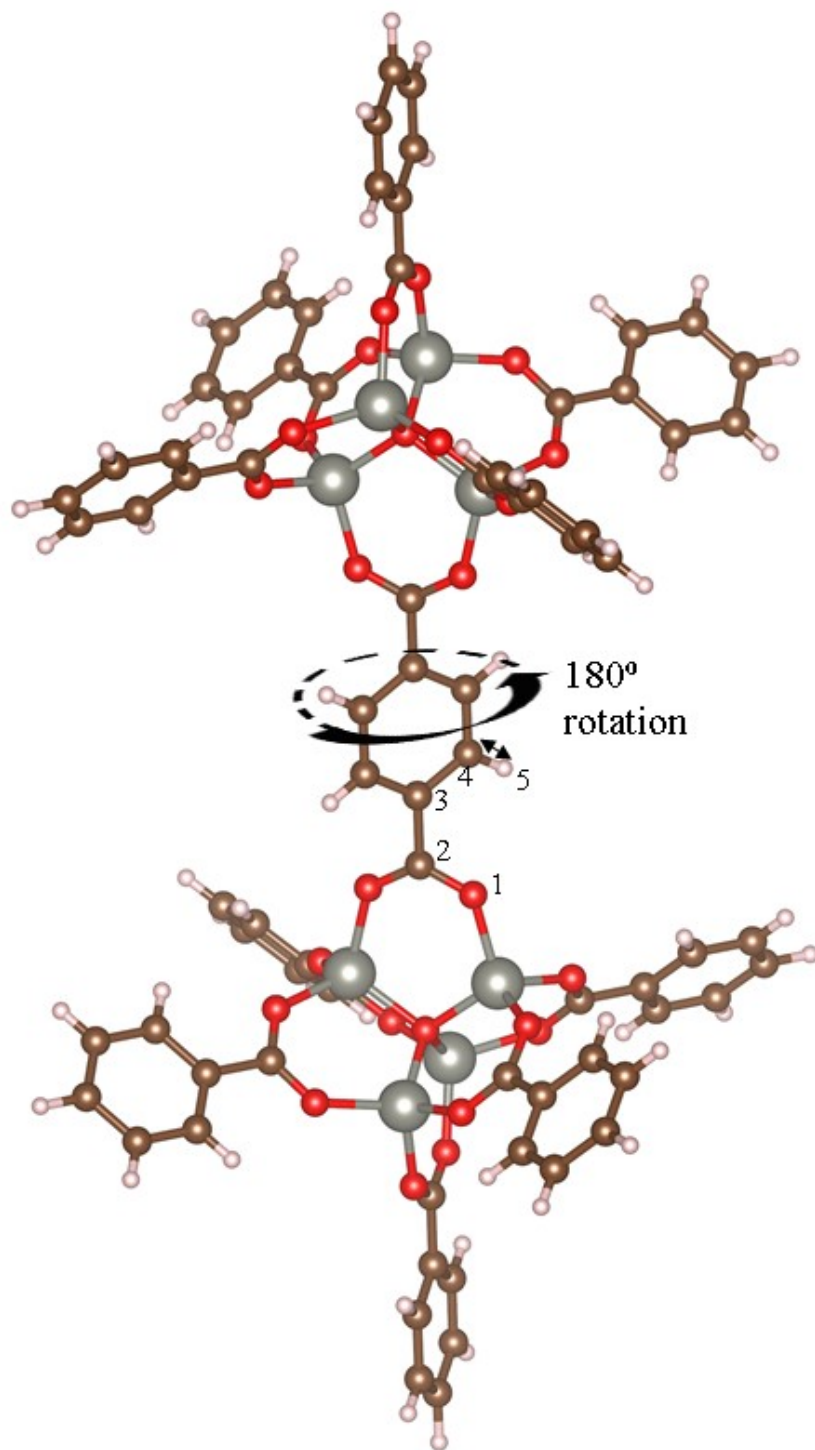

**Figure S8.** IRMOF-1 truncated structure for phenylene ring torsion by scan of dihedral angle, ( $\Phi_{1234}$ ) from 0 to 180° and aromatic C-H distance of ( $r_{45}$ ) from 1.02Å to 1.16Å

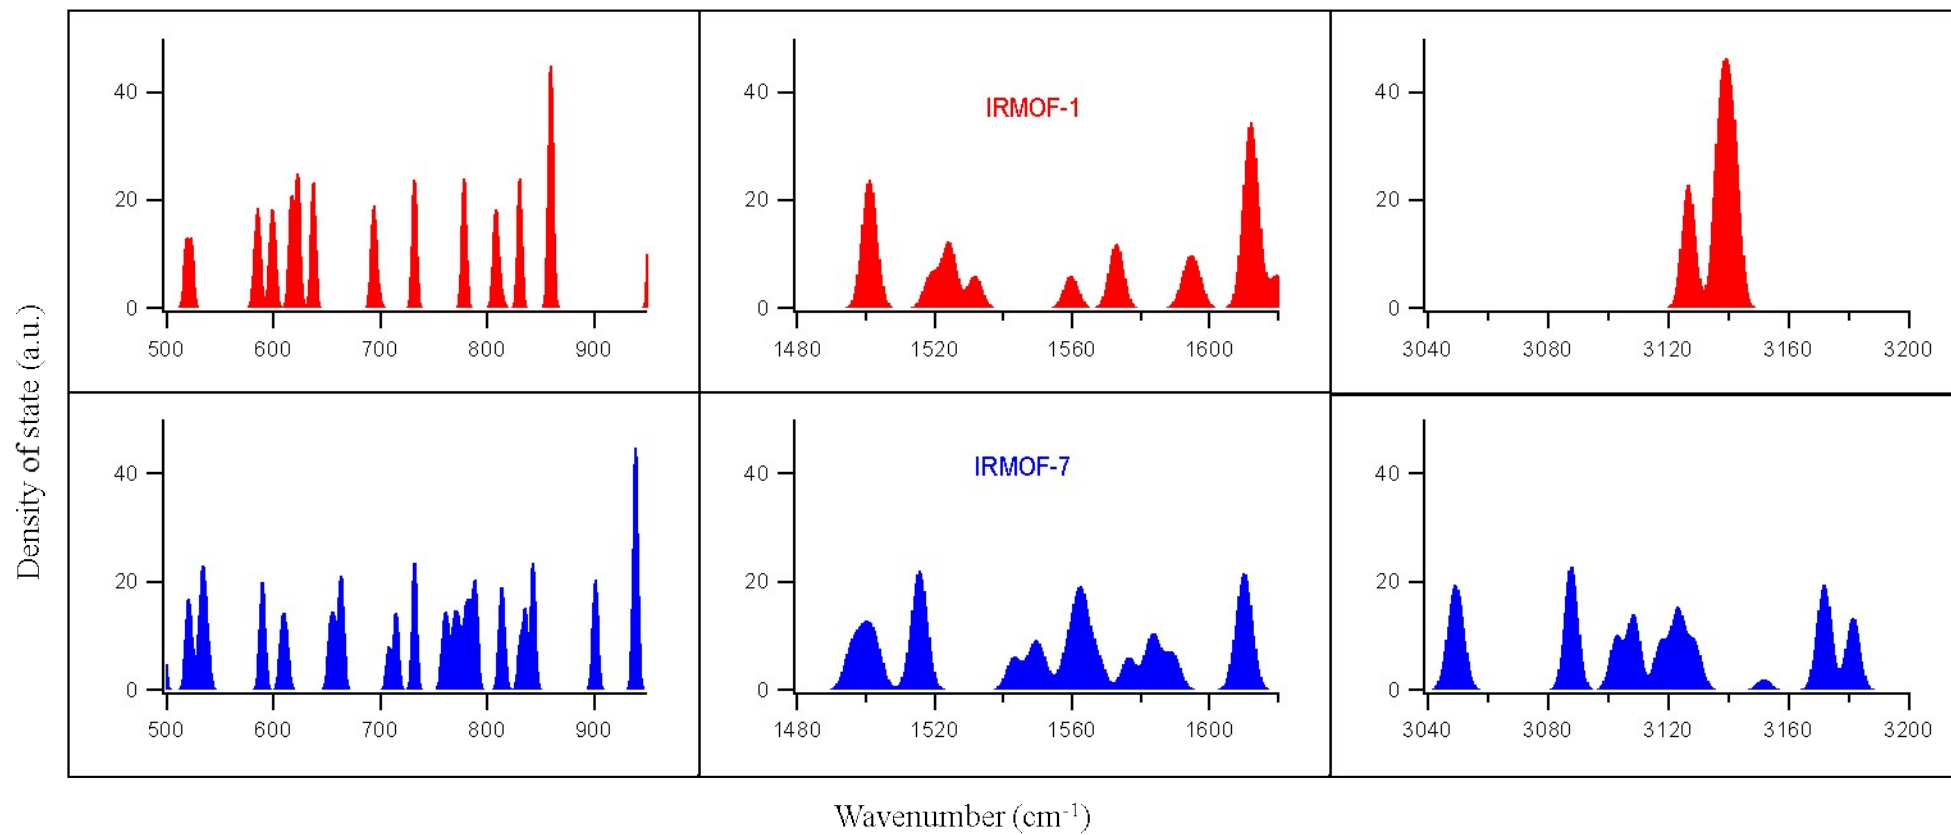

**Figure S9.** IRMOF-1 and IRMOF-7 vibrations zoomed in different regions

## Non-linear thermal expansion coefficient

The linear equation between temperature and volume in equation ( 1 ) no longer holds for these unusual MOFs with simultaneous PTE and NTE. The thermal expansion coefficient must be a function of temperature; and thus, at a distinct temperature, these MOFs should have neither positive nor negative thermal expansions (PTE to NTE switching temperature). In order to cover these MOFs, we can modify the equation ( 1 ) by defining thermal expansion coefficient as a function of temperature:

$$\alpha_0 = f(T) = m + nT + \dots$$

For the first order approximation, temperature dependent thermal expansion coefficient is in the form of

$$\alpha_0 = m + nT$$

Substituting this equation in the integration will yield:

$$\langle \ln(V) \rangle_P \approx \frac{nT^2}{2} + mT + C$$

where  $m$  and  $n$  are the coefficients and can be determined from the nonlinear (quadratic) fit of the  $\ln(V)$ - $T$  plot.

**Table S1.** Thermal expansion coefficient calculations based on quadratic and linear equations. ST shows PTE to NTE switching temperature

| IRMOF-n | m x 10 <sup>6</sup> | n x 10 <sup>8</sup> | Quadratic equation                                   | Linear equation           | ST=-m/n   |            | $\alpha_0=m+nT$           |                           | $\alpha_0=\text{constant}$ |
|---------|---------------------|---------------------|------------------------------------------------------|---------------------------|-----------|------------|---------------------------|---------------------------|----------------------------|
|         |                     |                     |                                                      |                           |           |            | 200K<br>x 10 <sup>6</sup> | 300K<br>x 10 <sup>6</sup> | T independent $\alpha_0$   |
| 1       | -60.42              | 4.52                | 2.2576E-08T <sup>2</sup> - 6.0422E-05T + 9.7841E+00  | -4.6876E-05T + 9.7822E+00 |           | Only NTE   | -51.392                   | -46.876                   | -46.900                    |
| 4       | 662.76              | -251.42             | -1.2571E-06T <sup>2</sup> + 6.6276E-04T + 9.6715E+00 | -9.1506E-05T + 9.7784E+00 | 263.60671 | PTE to NTE | 159.920                   | -91.500                   | -91.506                    |
| 6       | -25.74              | -2.94               | -1.4719E-08T <sup>2</sup> - 2.5735E-05T + 9.7972E+00 | -3.4566E-05T + 9.7984E+00 |           | Only NTE   | -31.623                   | -34.566                   | -34.566                    |
| 7       | 1459.31             | -512.78             | -2.5639E-06T <sup>2</sup> + 1.4593E-03T + 9.4736E+00 | -7.9032E-05T + 9.6915E+00 | 284.58793 | PTE to NTE | 433.750                   | -79.030                   | -79.032                    |
| 10      | -20.12              | -10.04              | -5.0190E-08T <sup>2</sup> - 2.0119E-05T + 1.0644E+01 | -5.0233E-05T + 1.0648E+01 |           | Only NTE   | -40.195                   | -50.233                   | -50.233                    |

**Table S2** Equilibrium lattice parameters produced by NNP at different temperatures.

| T (K) | Lattice constant (a=b=c) in Angstrom |             |             |             |             | ln(<Volume>) |          |          |          |          |
|-------|--------------------------------------|-------------|-------------|-------------|-------------|--------------|----------|----------|----------|----------|
|       | IRMOF-1                              | IRMOF-4     | IRMOF-6     | IRMOF-7     | IRMOF-10    | IRMOF-1      | IRMOF-4  | IRMOF-6  | IRMOF-7  | IRMOF-10 |
| 200   | 25.98776171                          | 25.81962824 | 26.14978993 | 25.05992992 | 34.67394602 | 9.77286941   | 9.753397 | 9.791518 | 9.663732 | 10.63796 |
| 250   | 25.96690189                          | 25.8814584  | 26.13413159 | 25.16866906 | 34.64504411 | 9.770458158  | 9.760572 | 9.789719 | 9.676775 | 10.63546 |
| 300   | 25.94791248                          | 25.82383728 | 26.12004725 | 25.19608271 | 34.61687294 | 9.76826027   | 9.753879 | 9.788099 | 9.680009 | 10.63301 |
| 350   | 25.92291174                          | 25.80800564 | 26.10659322 | 25.13368317 | 34.59628239 | 9.76536445   | 9.752037 | 9.786552 | 9.672566 | 10.63123 |
| 400   | 25.90853144                          | 25.66023341 | 26.08842062 | 24.91328927 | 34.55357941 | 9.76369724   | 9.734788 | 9.78446  | 9.646079 | 10.62752 |

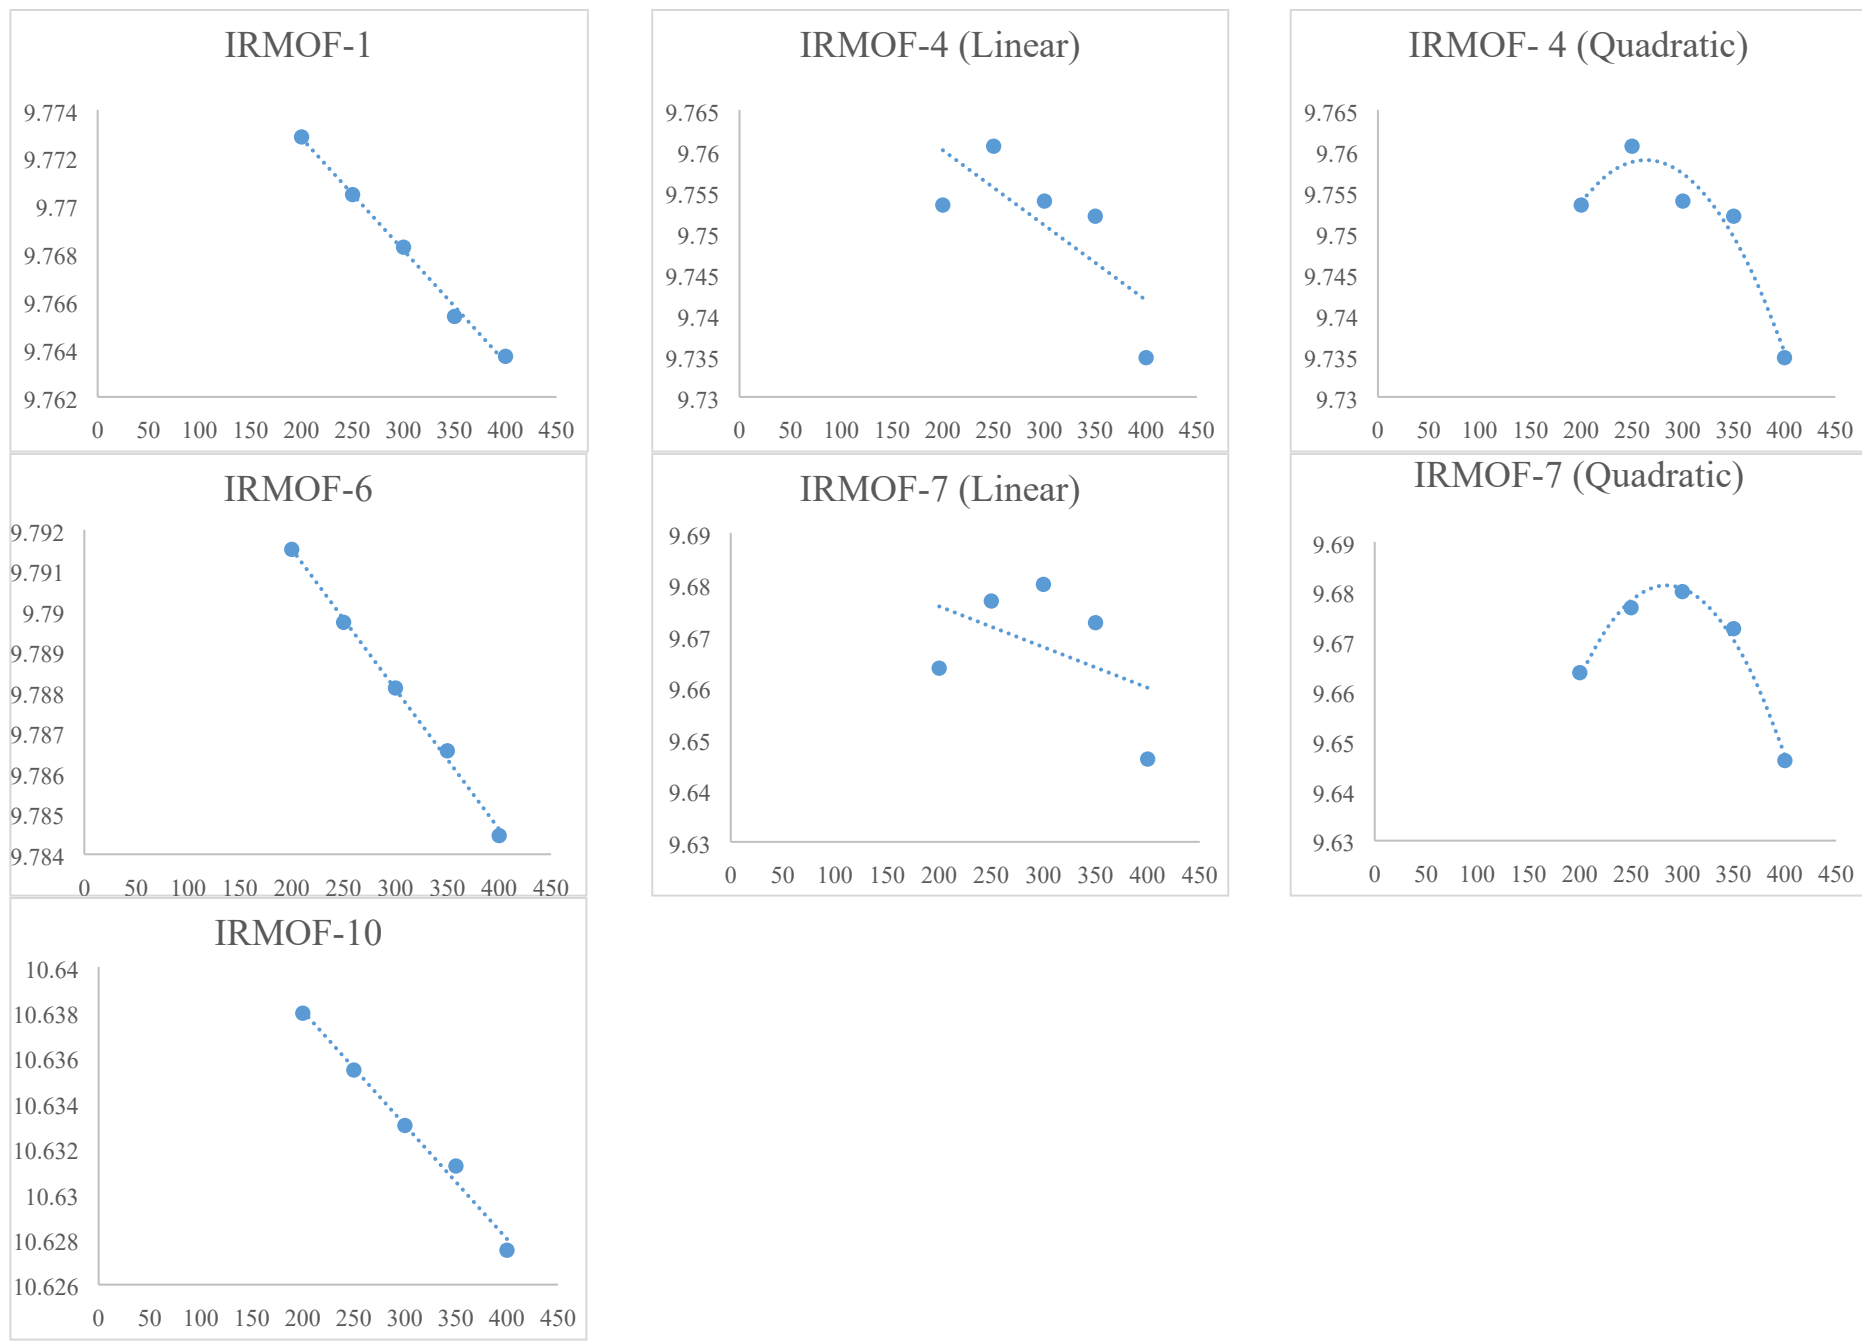

**Figure S10.**  $\ln(\langle V \rangle)$  vs.  $T$  (in Kelvin) plots for thermal expansion coefficients



**Table S3** Thermal pressure coefficients calculated from MD simulations using NNP

| IRMOF-n   | Thermal Pressure Coefficient, $\gamma$ (MPaK <sup>-1</sup> ) |            |                         |
|-----------|--------------------------------------------------------------|------------|-------------------------|
|           | NNP (100K)                                                   | NNP (300K) | Literature (300K) [[1]] |
| <b>1</b>  | -0.6768                                                      | -0.4205    | -0.408                  |
| <b>4</b>  | 2.0070                                                       | -0.7558    | -                       |
| <b>6</b>  | -0.4614                                                      | -0.4079    | -                       |
| <b>7</b>  | 2.8541                                                       | -0.1818    | -                       |
| <b>10</b> | -0.2794                                                      | -0.2627    | -0.233                  |

a)

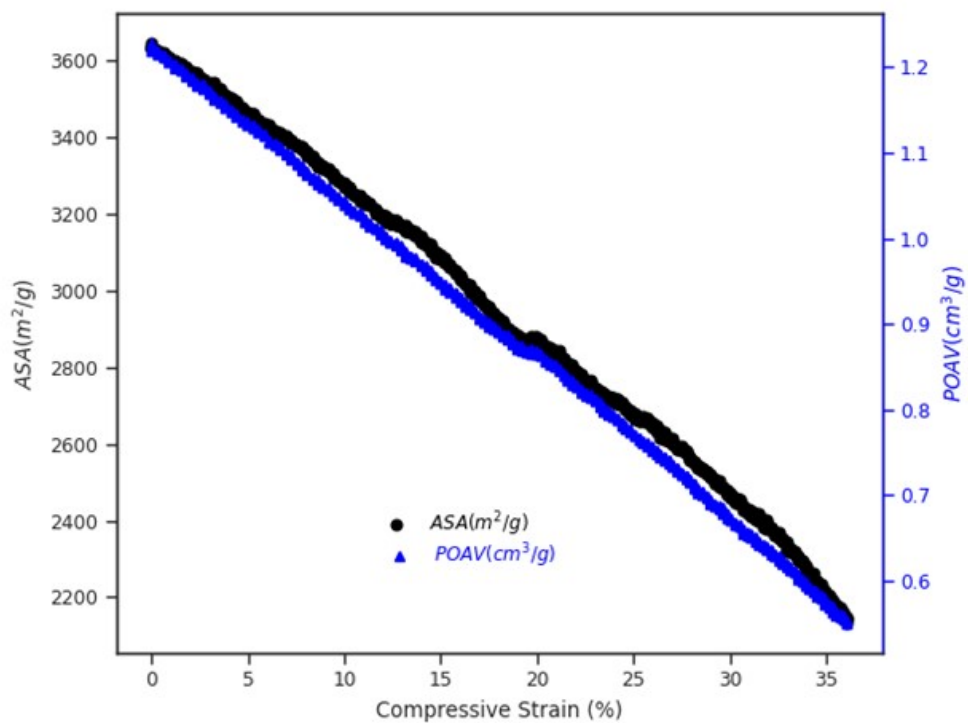

b)

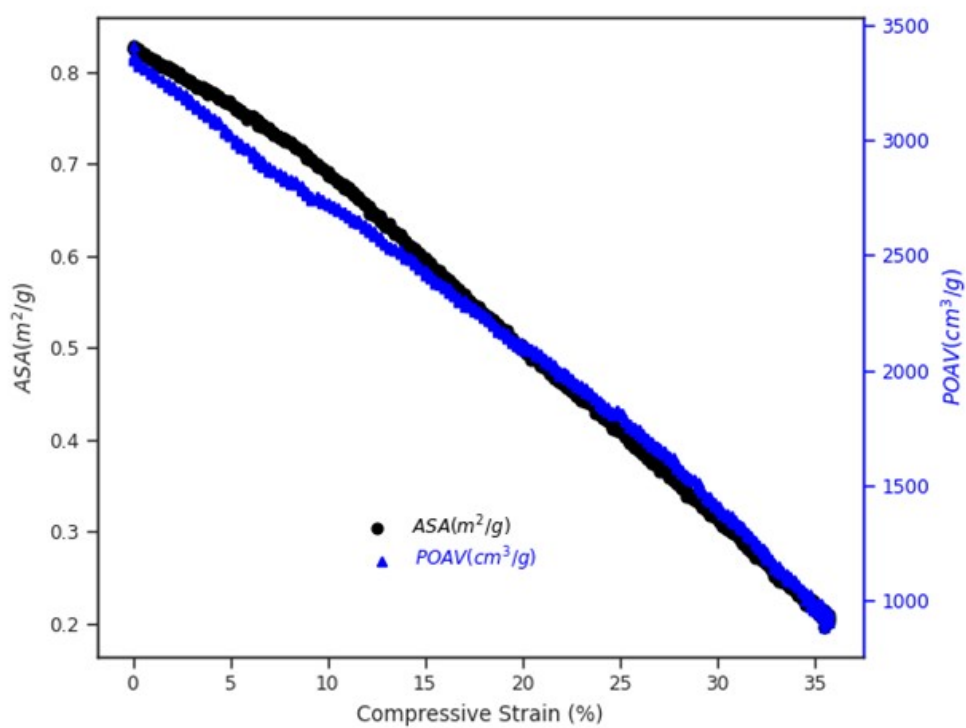

**Figure S11.** ASA and POAV change of a) IRMOF-1 and b) IRMOF-7 upon stress applied along [001] direction
